# Supplementary material for: Gene signature of the post-Chernobyl papillary thyroid cancer
Source: Springer Nature journal article supplement (doi:10.1007/s00259-015-3303-3), 2016-01-26
Supplement: MOESM8 [file 8220256]

Table S5. Genes used in the validation of microarray data with the QPCR method (genes that confirmed the microarray data are marked with grey background). These genes are ordered according to Fold-change, defined by QPCR

| Gene       | Description                                                                                       | QPCR     |       |             | Microarrays |       |             | Gene function in respect to participation in response to DNA damage and/or in regulation of ERK pathway                                                                                                                                                                                                                                        | References                                                      |
|------------|---------------------------------------------------------------------------------------------------|----------|-------|-------------|-------------|-------|-------------|------------------------------------------------------------------------------------------------------------------------------------------------------------------------------------------------------------------------------------------------------------------------------------------------------------------------------------------------|-----------------------------------------------------------------|
|            |                                                                                                   | Pvalue   | FDR   | Fold-Change | Pvalue      | FDR   | Fold-change |                                                                                                                                                                                                                                                                                                                                                |                                                                 |
| RAD51AP1   | RAD51 associated protein 1                                                                        | 1,10E-02 | 0,021 | 0,553       | 5,11E-05    | 0,036 | 0,58        | Genetic ablation of <i>RAD51AP1</i> leads to enhanced sensitivity to chromosome aberrations upon DNA damage. <i>RAD51AP1</i> -depleted cells have deficits in recombination-based repair of a DNA double-strand break, and exhibit chromatin breaks both spontaneously and upon DNA-damaging treatment.                                        | Dray E et al., 2011; Wiese C et al., 2007                       |
| CDK1(CDC2) | cyclin-dependent kinase 1                                                                         | 9,00E-03 | 0,021 | 0,673       | 9,40E-04    | 0,084 | 0,57        | CDC2 is required for efficient 5' to 3' resection of double-strand break ends, and for the recruitment of both the single-stranded DNA-binding complex, RPA, and the RAD51 recombination protein. Expression of <i>CDC2</i> in fibroblasts is reduced in response to radiation. Its suppression is essential for DNA damage-induced G2 arrest. | Zhou T et al., 2006; Babbist M et al., 1996; Ira G et al., 2004 |
| THRA       | thyroid hormone receptor, alpha (erythroblastic leukemia viral (v-erb-a) oncogene homolog, avian) | 2,40E-03 | 0,009 | 1,157       | 1,87E-04    | 0,059 | 1,32        | Acts as transcriptional repressor and in this role participates in the regulation of DSB repair                                                                                                                                                                                                                                                | Kress E et al., 2008; Yu J et al., 2006                         |
| SOCS7      | suppressor of cytokine signaling 7                                                                | 5,00E-04 | 0,004 | 1,215       | 6,35E-05    | 0,040 | 1,38        | Belongs to SOX septin family. The association between septins, SOCS7 and other proteins in the DNA damage checkpoint response has been reported. SOCS7 regulates actin organization and cell cycle arrest.                                                                                                                                     | Kremer BE et al., 2007;                                         |
| CIC        | capicua homolog (Drosophila)                                                                      | 1,70E-03 | 0,008 | 1,221       | 2,30E-05    | 0,034 | 1,26        | It may encode evolutionarily conserved protein involved in hypoxia tolerance. Loss of capicua can desensitize cells to the effects of ERK pathway inhibition. CIC may represent a new member of a SOX-related HMG subfamily (OMIM database).                                                                                                   | Dissanayake K et al., 2011; Udpa N et al., 2014                 |
| PPP1R9A    | protein phosphatase 1, regulatory (inhibitor) subunit 9A                                          | 1,10E-02 | 0,021 | 1,225       | 1,25E-05    | 0,034 | 1,5         | PP1 is a crucial component in the ATM-Chk2-p53 signaling pathway                                                                                                                                                                                                                                                                               | Lu et al., 2013                                                 |
| PPME1      | protein phosphatase methylesterase 1                                                              | 1,00E-04 | 0,002 | 1,245       | 2,81E-04    | 0,063 | 1,19        | its protein product, protein phosphatase methylesterase 1, is regarded as a key molecule that sustain, via inhibition of PP2A, the activation of ERK activity in cancer cells                                                                                                                                                                  | Lankoff A et al., 2006; Puustinen P et al., 2009                |
| HDAC11     | histone deacetylase 11                                                                            | 7,00E-04 | 0,004 | 1,247       | 3,00E-05    | 0,034 | 1,47        | It is activated by radiation. Interacts with RB-E2F to inhibit gene transcription.                                                                                                                                                                                                                                                             | Guo C et al., 2007                                              |

|         |                                                                                                                |          |       |       |          |        |      |                                                                                                                                                                                                                                                                     |                                                     |
|---------|----------------------------------------------------------------------------------------------------------------|----------|-------|-------|----------|--------|------|---------------------------------------------------------------------------------------------------------------------------------------------------------------------------------------------------------------------------------------------------------------------|-----------------------------------------------------|
| HDGF    | hepatoma-derived growth factor (high-mobility group protein 1-like)                                            | 1,00E-02 | 0,021 | 1,275 | 3,92E-05 | 0,035  | 1,19 | Its product is a multifunctional protein which participates in many cellular events including DNA damage repair and transcriptional regulation; its expression is related to radiosensitivity of cancer cells                                                       | Matsuyama A et al., 2007; Zhao J et al., 2011       |
| ERBB2   | v-erb-b2 erythroblastic leukemia viral oncogene homolog 2, neuro/glioblastoma derived oncogene homolog (avian) | 4,30E-03 | 0,014 | 1,341 | 1,32E-04 | 0,053  | 1,32 | A member of the EGF receptor family,as such activates MAPK pathway.                                                                                                                                                                                                 | Salzano M et al., 2014                              |
| MKNK2   | MAP kinase interacting serine/threonine kinase 2                                                               | 0,1067   | 0,184 | 1,056 | 1,30E-05 | 0,0341 | 1,29 | The kinase Mnk2 is a substrate of the MAPK pathway and phosphorylates the translation initiation factor eIF4E. Mnk2a downregulation by alternative splicing is a tumor suppressor mechanism.                                                                        | Maimon A et al., 2014; Slentz-Kesler K et al., 2000 |
| NRAS    | neuroblastoma RAS viral (v-ras) oncogene homolog                                                               | 0,1556   | 0,246 | 0,925 | 2,29E-04 | 0,0609 | 0,67 | NRAS mutations in papillary thyroid carcinoma lead to constitutive activation of the MAPK pathway                                                                                                                                                                   | Zou M et al., 2014                                  |
| JUB     | jub, ajuba homolog (Xenopus laevis)                                                                            | 0,2997   | 0,438 | 1,054 | 4,53E-05 | 0,0359 | 1,39 | In mouse fibroblasts expressing Ajuba, MAPK1 (mitogen-activated protein kinase 1) activity persisted despite serum starvation and upon serum stimulation; MAPK activity was 5-fold higher than in colorectal cells                                                  | Goyal R.K et al., 1999                              |
| USP15   | ubiquitin specific peptidase 15                                                                                | 0,5516   | 0,749 | 1,157 | 5,44E-05 | 0,0369 | 0,75 | USP15 is a deubiquitinase, a highly conserved protein involved in the regulation of intracellular protein breakdown, cell cycle regulation and stress response                                                                                                      | OMIM database                                       |
| FAM105A | family with sequence similarity 105, member A                                                                  | 0,5944   | 0,753 | 1,027 | 1,30E-04 | 0,0526 | 0,55 | Its protein product is proapoptotic protein                                                                                                                                                                                                                         | Mannherz O et al., 2006                             |
| MNT     | MAX binding protein                                                                                            | 0,7306   | 0,868 | 1,016 | 2,90E-06 | 0,0187 | 1,28 | MNT is a pro-survival protein important for mitogen. Max-interacting protein MNT is up-regulated in activated lymphocytes and was found to protect lymphocytes from MYC-dependent apoptosis                                                                         | Link JM & Hurlin PJ, 2014                           |
| GPX7    | glutathione peroxidase 7                                                                                       | 0,8757   | 0,979 | 0,978 | 1,20E-06 | 0,0103 | 0,61 | GPX7 participates in response of thyrocytes to oxidative stress.                                                                                                                                                                                                    | Kolypetri el al., 2014                              |
| PALM3   | Paralemmin-3                                                                                                   | 0,975    | 1     | 1,049 | 3,38E-05 | 0,0341 | 3,42 | Paralemmin 3, an ancient protein, is an isoform of paralemmin 1, a protein implicated in plasma membrane dynamics, also the invasiveness and metastatic potential of cancer cells. However, data suggest that each paralemmin has a unique function, not yet known. | Hultqvist G et al., 2012                            |
| GNA11   | guanine nucleotide binding protein (G protein), alpha 11 (Gq class)                                            | 1        | 1     | 1,014 | 2,94E-05 | 0,0341 | 1,25 | Thyrocyte specific Gq/G11- deficient mice lacked the normal proliferative thyroid response to TSH or goitrogenic diet, indicating an essential role of this pathway in the adaptive growth of the thyroid gland.                                                    | Bäck C.M et al., 2013                               |

## References:

- Bäck CM, Stohr S, Schäfer EA, Biebermann H, Boekhoff I, Breit A et al. TSH induces metallothionein 1 in thyrocytes via Gq/11- and PKC-dependent signaling. *J Mol Endocrinol* 2013; *51*:79-90.
- Dissanayake K, Toth R, Blakey J, Olsson O, Campbell DG, Prescott AR et al. ERK/p90(RSK)/14-3-3 signalling has an impact on expression of PEA3 Ets transcription factors via the transcriptional repressor capicua. *Biochem J* 2011; *433*: 515-525.
- Dray E, Dunlop MH, Kauppi L, San FJ, Wiese C, Tsai MS et al. Molecular basis for enhancement of the meiotic DMC1 recombinase by RAD51 associated protein 1 (RAD51AP1). *Proc Natl Acad Sci USA* 2011; *108*: 3560-3565.
- Goyal RK, Lin P, Kanungo J, Payne AS, Muslin AJ, Longmore GD. Ajuba, a novel LIM protein, interacts with Grb2, augments mitogen-activated protein kinase activity in fibroblasts, and promotes meiotic maturation of *Xenopus* oocytes in a Grb2- and Ras-dependent manner. *Mol Cell Biol* 1999; *19*:4379-89.
- Hultqvist G, Ocampo Daza D, Larhammar D, Kilimann MW. Evolution of the vertebrate paralemmin gene family: ancient origin of gene duplicates suggests distinct functions. *PLoS One* 2012; *7*(7):e41850. doi: 10.1371/journal.pone.0041850.
- Ira G, Pelliccioli A, Balijja A, Wang X, Fiorani S, Carotenuto W et al. DNA end resection, homologous recombination and DNA damage checkpoint activation require CDK1. *Nature* 2004; *431*: 1011-1017.
- Kolypetri P and Carayanniotis G. Apoptosis of NOD.H2 h4 thyrocytes by low concentrations of iodide is associated with impaired control of oxidative stress. *Thyroid* 2014; *24*: 1170-1178.
- Kremer BE, Adang LA and Macara IG. Septins regulate actin organization and cell-cycle arrest through nuclear accumulation of NCK mediated by SOCS7. *Cell* 2007; *130*: 837-850.
- Kress E, Rezza A, Nadjar J, Samarut J and Plateroti M. The thyroid hormone receptor-alpha (TRalpha) gene encoding TRalpha1 controls deoxyribonucleic acid damage-induced tissue repair. *Mol Endocrinol* 2008; *22*: 47-55.
- Link JM, Hurlin PJ. The activities of MYC, MNT and the MAX-interactome in lymphocyte proliferation and oncogenesis. *Biochim Biophys Acta* 2014 Apr 13. pii: S1874-9399(14)00081-9. doi: 10.1016/j.bbagr.2014.04.004.
- Lu Z, Wan G, Guo H, Zhang X and Lu X. Protein phosphatase 1 inhibits p53 signaling by dephosphorylating and stabilizing Mdmx. *Cell Signal* 2013; *25*: 796-804.
- Maimon A, Mogilevsky M, Shilo A, Golan-Gerstl R, Obiedat A, Ben-Hur V et al. Mnk2 alternative splicing modulates the p38-MAPK pathway and impacts Ras-induced transformation. *Cell Rep* 2014; *24*:501-13.
- Mannherz O, Mertens D, Hahn M, Lichter P. Functional screening for proapoptotic genes by reverse transfection cell array technology. *Genomics* 2006; *87*:665-72.

Salzano M, Vázquez-Cedeira M, Sanz-García M, Valbuena A, Blanco S, Fernández IF et al. Vaccinia-related kinase 1 (VRK1) confers resistance to DNA-damaging agents in human breast cancer by affecting DNA damage response. *Oncotarget* 2014; *15*:1770-8.

Slentz-Kesler K, Moore JT, Lombard M, Zhang J, Hollingsworth R, Weiner MP. Identification of the human Mnk2 gene (MKNK2) through protein interaction with estrogen receptor beta. *Genomics* 2000; *69*:63-71.

Udpa N, Ronen R, Zhou D, Liang J, Stobdan T, Appenzeller O et al. Whole genome sequencing of Ethiopian highlanders reveals conserved hypoxia tolerance genes. *Genome Biol* 2014; *15*: R36.

Wiese C, Dray E, Groesser T, San FJ, Shi I, Collins DW et al. Promotion of homologous recombination and genomic stability by RAD51AP1 via RAD51 recombinase enhancement. *Mol Cell* 2007; *28*: 482-490.

Yu J, Palmer C, Alenghat T, Li Y, Kao G and Lazar MA. The corepressor silencing mediator for retinoid and thyroid hormone receptor facilitates cellular recovery from DNA double-strand breaks. *Cancer Res* 2006; *66*: 9316-9322.

Zou M, Baitei EY, Alzahrani AS, BinHumaid FS, Alkhafaji D, Al-Rijjal RA et al. Concomitant RAS, RET/PTC, or BRAF Mutations in Advanced Stage of Papillary Thyroid Carcinoma. *Thyroid* 2014; *24*:1256-66.
