# Supplementary material for: Gene signature of the post-Chernobyl papillary thyroid cancer
Source: Eur J Nucl Med Mol Imaging. 2016 Jan 26;43:1267–77. doi: 10.1007/s00259-015-3303-3 (PMC4869750; doi:10.1007/s00259-015-3303-3)

Figure S1. Origin of thyroid samples used in our study

A: gene 3' expression microarray study; B: validation studies (exon microarray and qPCR)

A.

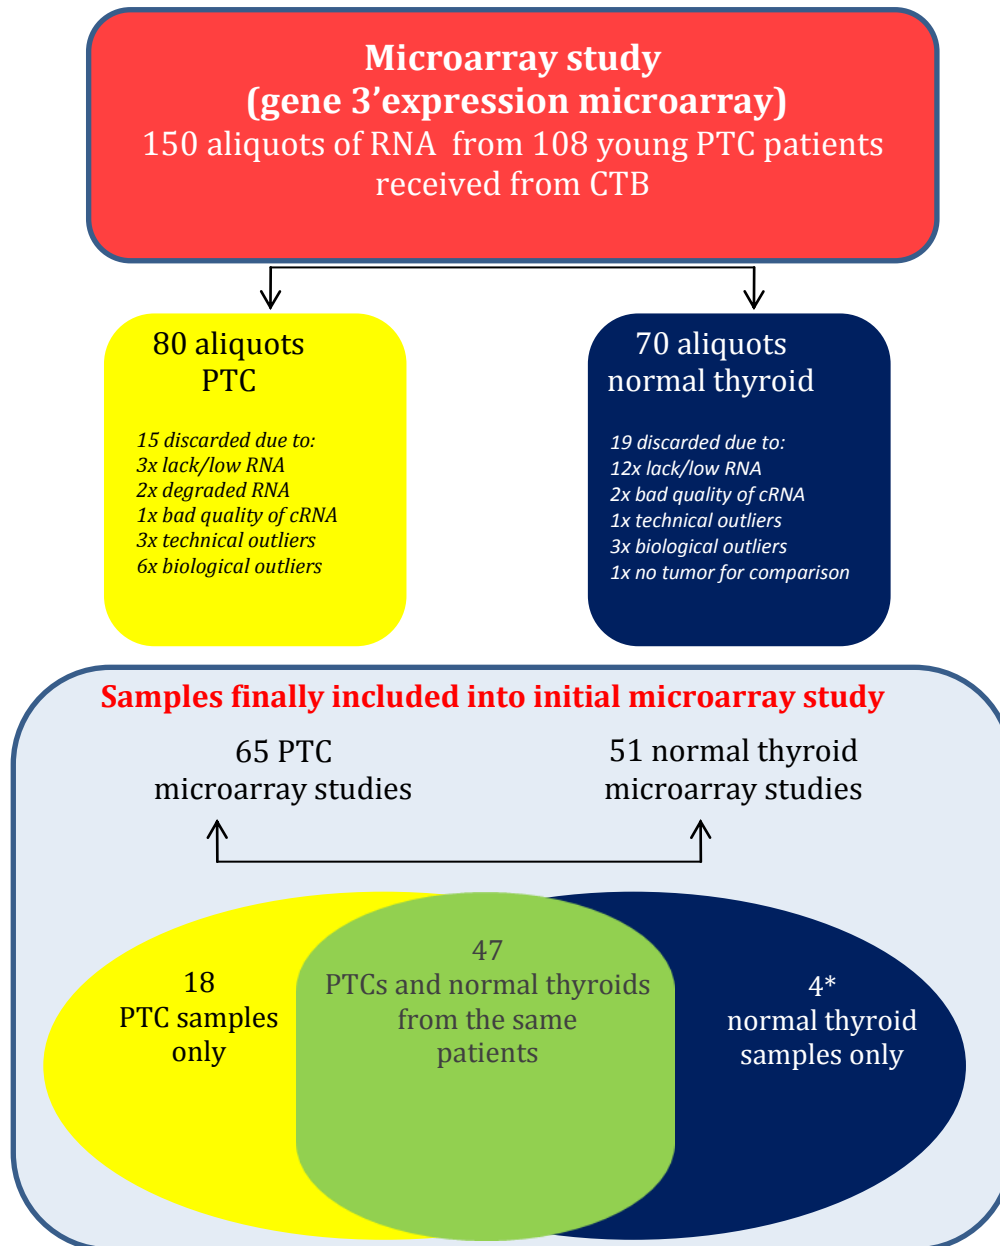

\* Their tumor counterparts were discarded (1x lack of RNA; 3x biological outliers)

B.

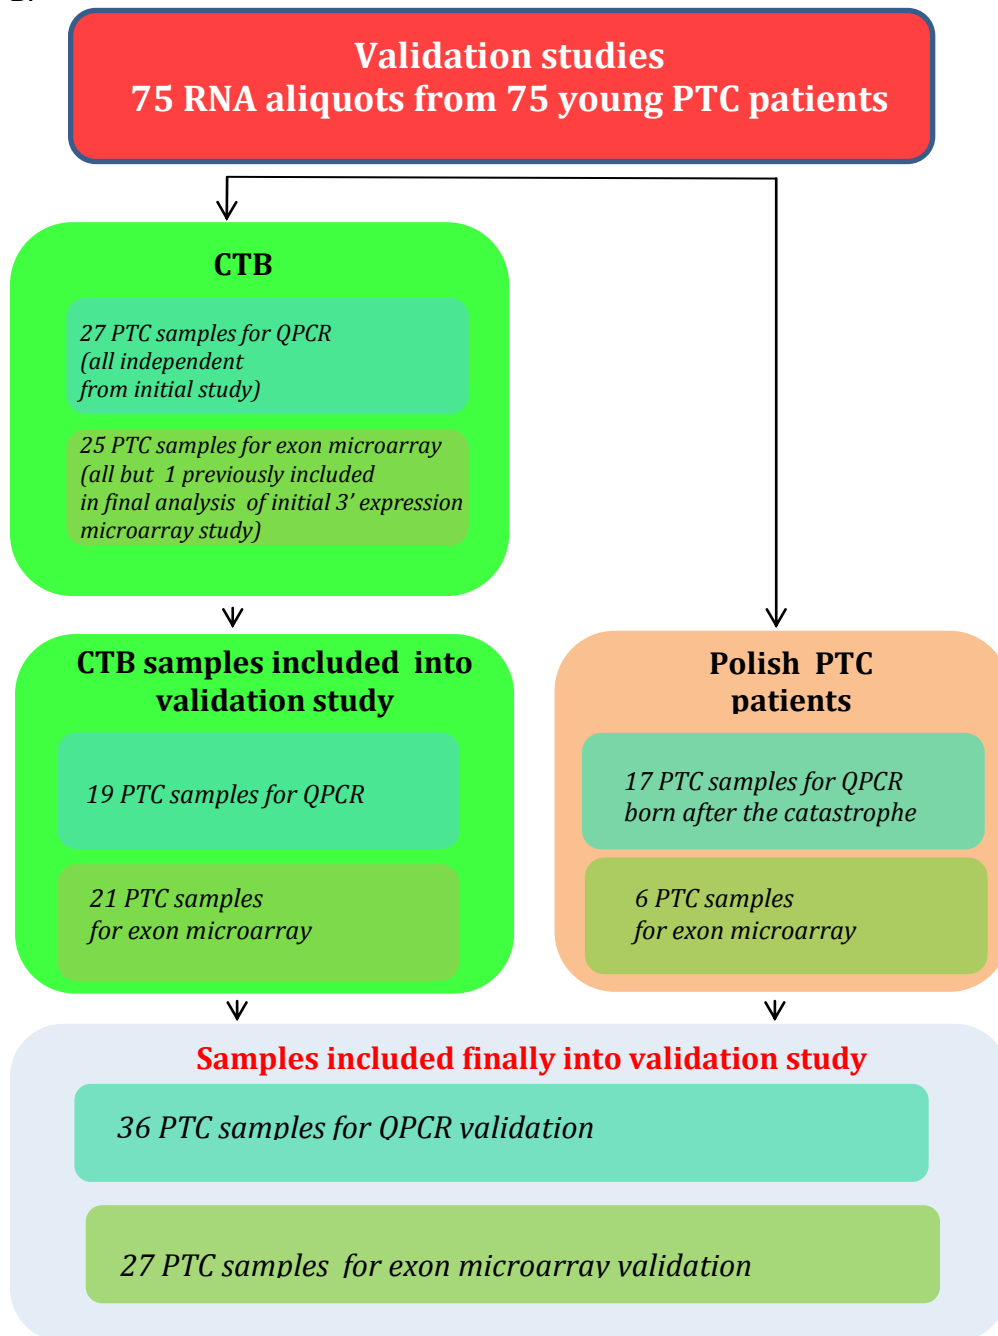

Supplement: Supplementary file 2 — (PDF 727 kb) [file 259_2015_3303_MOESM2_ESM.pdf]
