# Supplementary material for: Gene signature of the post-Chernobyl papillary thyroid cancer
Source: Eur J Nucl Med Mol Imaging. 2016 Jan 26;43:1267–77. doi: 10.1007/s00259-015-3303-3 (PMC4869750; doi:10.1007/s00259-015-3303-3)
Supplement: Supplementary file 4 — (PDF 72 kb) [file 259_2015_3303_MOESM4_ESM.pdf]

**Table S1. Description of the PTC cases used for the exon microarray validation study in ECR and non-ECR PTC cases diagnosed <26 years of age.**

Note that in the ECR group PTC samples were derived from patients previously investigated within the initial microarray study (all 13 cases). Non-ECR group comprised from 8 non ECR patients derived from CTB (7 included also in the microarray study) and 6 independent Polish patients <26 years of age at diagnosis, other than used in the QPCR study. For 3 Polish patients the condition to be born after 1/1/1987 was not fulfilled, thus, they should be considered “probably non-ECR”.

|                              | ECR      | non-ECR   | Statistical comparison |
|------------------------------|----------|-----------|------------------------|
| Number                       | 13       | 14        | Not done               |
| Female/male                  | 8/5      | 12/2      | ns                     |
| Age at exposition            | 1.9±1.0  | Nd        | Nod done               |
| Age at operation             | 16.7±1.4 | 15.9±0.9  | ns                     |
| Histopathology               |          |           |                        |
| Pure classic PTC             | 1 (8%)   | 5 (36%)   | ns                     |
| PTC follicular variant*      | 8 (62%)  | 4 (28.6%) |                        |
| other                        | 4 (30%)  | 5 (36%)   |                        |
| Primary tumour (T stage)     |          |           |                        |
| 1                            | 7 (54%)  | 6 (42.9%) | ns                     |
| 2                            | 0        | 2 (14.3%) |                        |
| 3                            | 6 (46%)  | 6 (42.9%) |                        |
| Lymph nodes (N stage)        |          |           |                        |
| 0                            | 4 (31%)  | 5 (35.7%) | ns                     |
| 1                            | 9 (69%)  | 9 (64.3%) |                        |
| Distant Metastases (M stage) |          |           |                        |
| 0                            | 10 (77%) | 12 (86%)  | ns                     |
| 1                            | 3 (23%)  | 2 (14%)   |                        |

\*samples from CTB described as “PTC with follicular areas” were included here as PTC follicular variant  
Ns - not significant
