# Supplementary material for: Gene signature of the post-Chernobyl papillary thyroid cancer
Source: Eur J Nucl Med Mol Imaging. 2016 Jan 26;43:1267–77. doi: 10.1007/s00259-015-3303-3 (PMC4869750; doi:10.1007/s00259-015-3303-3)
Supplement: Supplementary file 7 — (PDF 14 kb) [file 259_2015_3303_MOESM7_ESM.pdf]

Table S4. The three-way analyses of variance of ECR/non-ECR differences

| Effect                                                                                                      | No of probesets at<br>$p < 0.001$ | No of probesets at<br>FDR < 10% |
|-------------------------------------------------------------------------------------------------------------|-----------------------------------|---------------------------------|
| <i>A. Radiation exposure-related differences in the context of the patient age at PTC diagnosis</i>         |                                   |                                 |
| Exposure to Chernobyl-related radiation                                                                     | 347                               | 781                             |
| Age<br><16/>16 years                                                                                        | 20                                | 0                               |
| Interaction<br>Exposure:Age                                                                                 | 14                                | 0                               |
| <i>B. Radiation exposure-related profile in the context of the known molecular factors relevant for PTC</i> |                                   |                                 |
| Exposure to Chernobyl-related radiation                                                                     | 485                               | 1531                            |
| <i>RET</i> rearrangement                                                                                    | 71                                | 13                              |
| Interaction<br>Exposure: <i>RET</i>                                                                         | 4                                 | 0                               |
| Exposure to Chernobyl-related radiation                                                                     | 209                               | 32                              |
| <i>BRAF</i> mutation                                                                                        | 443                               | 794                             |
| Interaction<br>Exposure: <i>BRAF</i>                                                                        | 11                                | 0                               |
| <i>C. Interaction between the effect of radiation exposure and the pathological PTC variant</i>             |                                   |                                 |
| Exposure to Chernobyl-related radiation                                                                     | 279                               | 376                             |
| Pathology<br>Classical+follicular/Solid component                                                           | 151                               | 66                              |
| Interaction<br>Exposure:Pathology                                                                           | 5                                 | 0                               |
